# Supplementary material for: Implications for SARS-CoV-2 Vaccine Design: Fusion of Spike Glycoprotein Transmembrane Domain to Receptor-Binding Domain Induces Trimerization
Source: PubMed Central journal article supplement (PMC7557813; doi:10.3390/membranes10090215), 2020-08-30

# Supplementary Materials: Implications for SARS-CoV-2 Vaccine Design: Fusion of Spike Glycoprotein Transmembrane Domain to Receptor Binding Domain Induces Trimerization

Taha Azad <sup>1,2,†</sup>, Ragunath Singaravelu <sup>1,2,†</sup>, Mathieu J.F. Crupi <sup>1,2,†</sup>, Taylor Jamieson <sup>1,2,†</sup>, Jaahnavi Dave <sup>1,2</sup>, Emily E.F. Brown <sup>1,2</sup>, Reza Rezaei <sup>1,2</sup>, Zaid Taha <sup>1,2</sup>, Stephen Boulton <sup>1,2</sup>, Nikolas T. Martin <sup>1,2</sup>, Abera Surendran<sup>1,2</sup>, Joanna Poutou<sup>1,2</sup>, Mina Ghahremani<sup>3</sup>, Kazem Nouri <sup>4</sup>, Jack T. Whelan <sup>1,2</sup>, Jessie Duong<sup>1,2</sup>, Sarah Tucker <sup>1,2</sup>, Jean-Simon Diallo <sup>1,2</sup>, John C. Bell <sup>1,2</sup> and Carolina S. Ilkow <sup>1,2,\*</sup>

<sup>1</sup> Ottawa Hospital Research Institute, Ottawa, ON, K1H 8L6 and Canada.

<sup>2</sup> Department of Biochemistry, Microbiology and Immunology, University of Ottawa, Ottawa, ON K1H 8M5, Canada.

<sup>3</sup> Department of Biology, University of Ottawa, Ottawa, ON, K1N 6N5, Canada.

<sup>4</sup> Princess Margaret Cancer Centre, University Health Network, Toronto, ON, Canada

\* Correspondence: cilkow@ohri.ca; Tel.: +1-613-737-8899 (ext. 75208).

† These authors contributed equally.

Received: 11 August 2020; Accepted: 28 August 2020; Published: date

## Uncropped blots

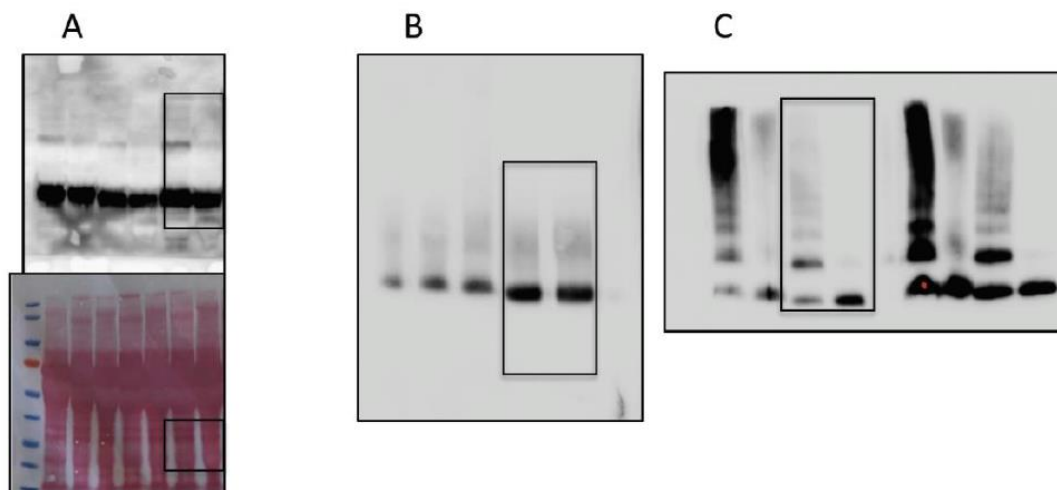

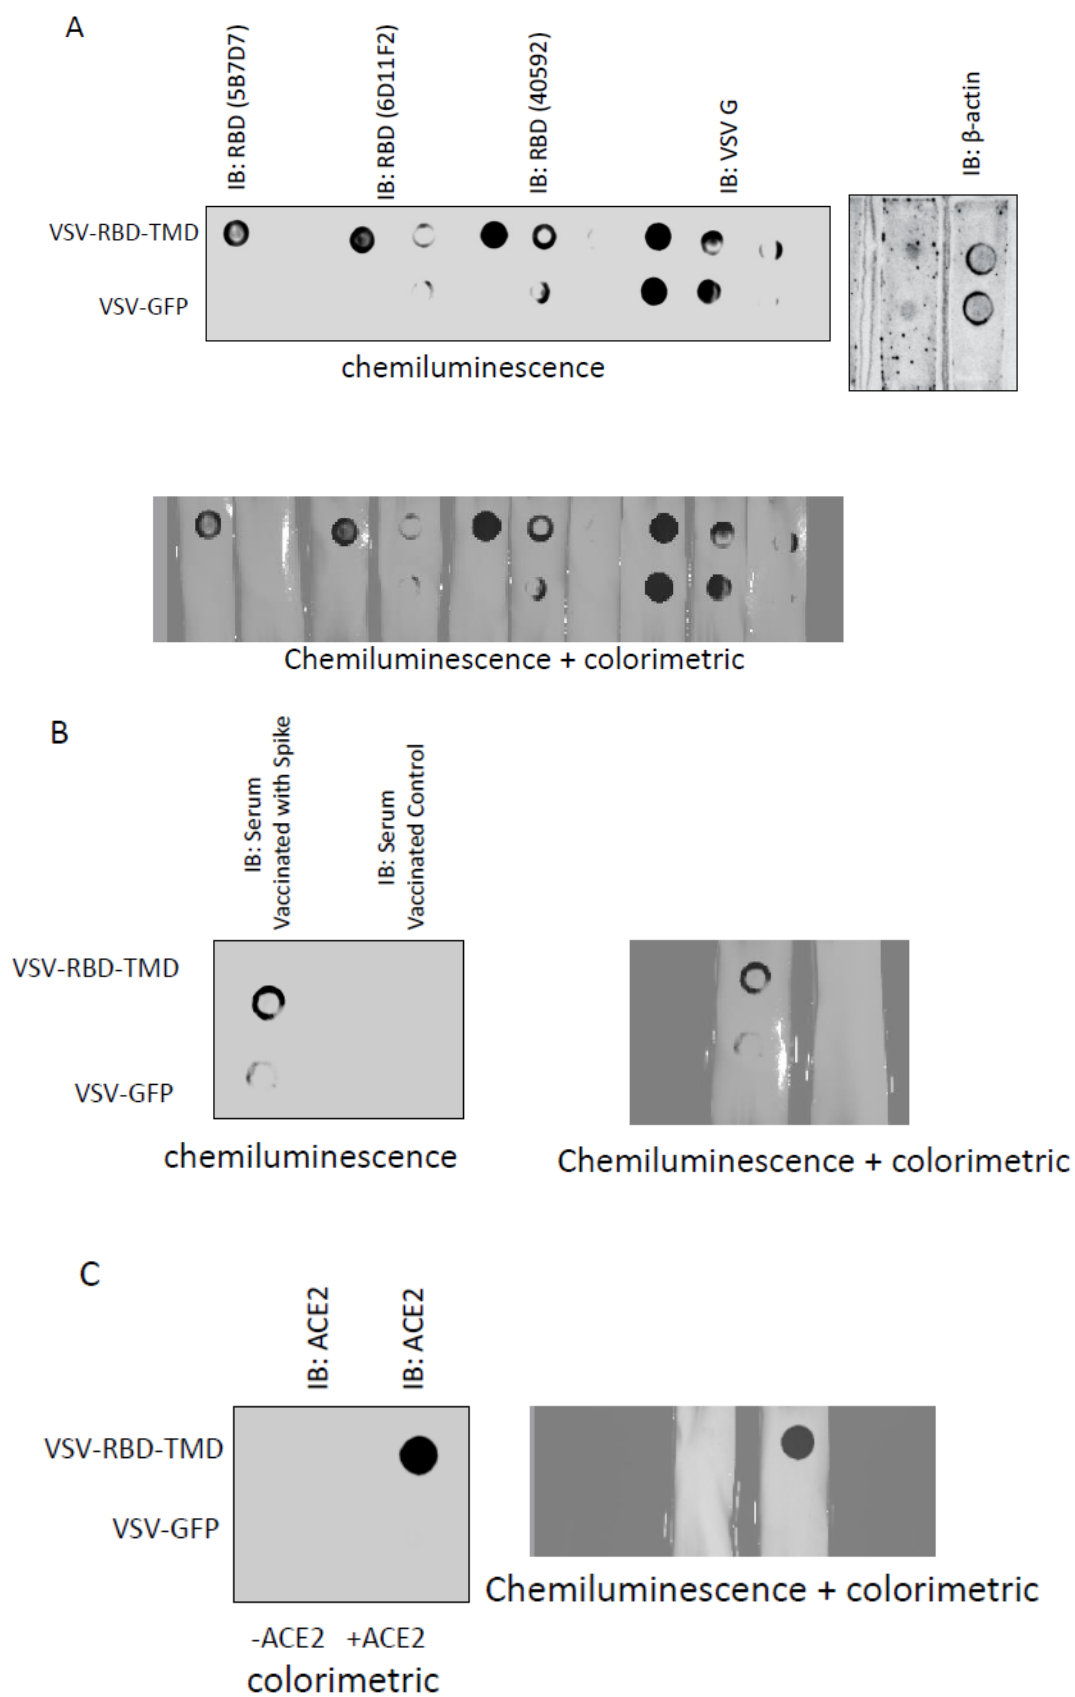

Figure S1. Uncropped blots.

**Table S1.** Insert DNA and Amino acid sequence.

| Insert           | DNA Sequence                                                                                                                                                                                                                                                                                                                                                                                                                                                                                                                                                                                                                                                                                                                                                                                                                                                                                                                                                                                                                                                                                                                                                                                                                                                                                                                                                                                                                                                                                                                                                                                                                                                                     | Amino Acid Sequence                                                                                                                                                                                                                                                                                                                                                                                                                                                                                                                                                                                                                                                                                                                                                                                                                                                                                                                                |
|------------------|----------------------------------------------------------------------------------------------------------------------------------------------------------------------------------------------------------------------------------------------------------------------------------------------------------------------------------------------------------------------------------------------------------------------------------------------------------------------------------------------------------------------------------------------------------------------------------------------------------------------------------------------------------------------------------------------------------------------------------------------------------------------------------------------------------------------------------------------------------------------------------------------------------------------------------------------------------------------------------------------------------------------------------------------------------------------------------------------------------------------------------------------------------------------------------------------------------------------------------------------------------------------------------------------------------------------------------------------------------------------------------------------------------------------------------------------------------------------------------------------------------------------------------------------------------------------------------------------------------------------------------------------------------------------------------|----------------------------------------------------------------------------------------------------------------------------------------------------------------------------------------------------------------------------------------------------------------------------------------------------------------------------------------------------------------------------------------------------------------------------------------------------------------------------------------------------------------------------------------------------------------------------------------------------------------------------------------------------------------------------------------------------------------------------------------------------------------------------------------------------------------------------------------------------------------------------------------------------------------------------------------------------|
| IgK-RBD-FLAG     | <p>ATGGAGACAGACACACTCCTGCTATGGGTACTGCTGCTCTGGG<br/>                     TTCCAGGTTCCACTGGTACTCTGGCTCTAGCGGCTCTGGCTCT<br/>                     AGCGGCGGCATGGT GAGCGGCTGGCGGCTGTTCAAGAAGATT<br/>                     AGCTCTAGCGGCGACTACAAGGACCACGACGGTACTACAAG<br/>                     GACCACGACATCGACTACAAGGACGACGACAAGGGCAG<br/>                     CGGCTCCGGCAGCAGCGGAGGAGGAGGCTCTGGAGGAGGAG<br/>                     GCTCTAGCGGCGCAACATCACAATCTGTGCCATTTCGGCGA<br/>                     GGTGTTTAAACGCCACCAGATTTGCCAGCGTGTATGCCTGGAAC<br/>                     CGGAAGAGAATCTCTAATTGCGTGGCCGACTATAGCGTGCTGT<br/>                     ACAATAGCGCCTCCTTCTCTACCTTTAAGTGCTATGGCGTGCC<br/>                     CCCACAAAGCTGAACGACCTGTGCTTACCAACGTGTACGCCG<br/>                     ACTCTTTTGTGATCAGGGGCGATGAGGTGCGCCAGATCGCACC<br/>                     TGGACAGACAGGCAAGATCGCCGACTACAATAAGCTGCC<br/>                     AGACGATTTACCGGCTGCGTGATCGCCTGGAATAGCAACAAT<br/>                     CTGGATTCCAAAGTGGGCGCAACTACAATTATCTGTACCGGC<br/>                     TGTT CAGAAAGAGCAACCTGAAGCCCTTTGAGCGGGATATCAG<br/>                     CACAGAGATCTACCAGGCAGGCTCCACCCCTTGAACGGAGT<br/>                     GGAGGGCTTCAATTGTTATTTTCCCCTGCAGAGCTACGGCTTCC<br/>                     AGCCTACAAATGGCGTGGCTATCAGCCATACAGGGTGGTGGT<br/>                     GCTGTCTTTGAGCTGCTGCACGCACCTGCAACCGTGTCTCTG<br/>                     GACACATCGAGGGCCGCCACATGCTGGAGATGGGCCATCATC<br/>                     ACCATCATCACCACCACCACCTGA</p>                                                                                                                                                             | <p>METDLLLLVLLLLWV<br/>                     PGSTGDSGSSGSGSSG<br/>                     GMVSGWRLFKKISSSG<br/>                     DYKDHDGDYKDHDID<br/>                     DYKDDDDKGS GSGSS<br/>                     GGGGSGGGSSGGNI<br/>                     TNLCPFGEVFNATRF<br/>                     ASVYAWNRRKRISNCV<br/>                     ADYSVLYNSASFSTFK<br/>                     CYGVSPKLNLDLFT<br/>                     NVYADSFVIRGDEVR<br/>                     QIAPGQTGKIADYNY<br/>                     KLPDDFTGCVIAWNS<br/>                     NNLDSKVGGNYNL<br/>                     YRLFRRKSNLKPFRDIS<br/>                     TEIYQAGSTPCNGVEG<br/>                     FNCYFPLQSYGFQPTN<br/>                     GVGYPYRVVLSFE<br/>                     LLHAPATVSSGHIEGR<br/>                     HMLEMGGHHHHHHH<br/>                     HHH</p>                                                                                  |
| IgK-RBD-TMD-FLAG | <p>ATGGAGACAGACACACTCCTGCTATGGGTACTGCTGCTCTGGG<br/>                     TTCCAGGTTCCACTGGTACTCTGGCTCTAGCGGCTCTGGCAGC<br/>                     GGCGACTACAAGGACCACGACGGTACTACAAGGACCACGAC<br/>                     ATCGACTACAAGGACGACGACGACAAGGGAGGAGGAGGCTCT<br/>                     AGCGGCGGCAACATCACAATCTGTGCCATTTCGGCGAGGTGT<br/>                     TTAACGCCACCAGATTTGCCAGCGTGTATGCCTGGAACCGGAA<br/>                     GAGAATCTCTAATTGCGTGGCCGACTATAGCGTGCTGTACAAT<br/>                     AGCGCCTCCTTCTCTACCTTTAAGTGCTATGGCGTGTCCCCAC<br/>                     AAAGCTGAACGACCTGTGCTTACCAACGTGTACGCCGACTCT<br/>                     TTTGTGATCAGGGGCGATGAGGTGCGCCAGATCGCACCTGGAC<br/>                     AGACAGGCAAGATCGCCGACTACAATAAGCTGCCAGACG<br/>                     ATTTACCGGCTGCGTGATCGCCTGGAATAGCAACAATCTGGA<br/>                     TTCCAAAGTGGGCGCAACTACAATTATCTGTACCGGCTGTT<br/>                     AGAAAGAGCAACCTGAAGCCCTTTGAGCGGGATATCAGCACA<br/>                     GAGATCTACCAGGCAGGCTCCACCCCTTGAACGGAGTGGAG<br/>                     GGCTTCAATTGTTATTTTCCCCTGCAGAGCTACGGCTTCCAGCC<br/>                     TACAAATGGCGTGGGCTATCAGCCATACAGGGTGGTGGTGGT<br/>                     TCCTTTGAGCTGCTGCACGCACCTGCAACCGTGGGAGTTCCG<br/>                     GTGGTGGCGGGAGCGGAGGTGGAGGCTCGAGCGGTGGATGGC<br/>                     CATGGTACATTTGGCTAGGTTTTATAGCTGGCTTGATTGCCATA<br/>                     GTAATGGTGACAATTATGCTTTGCTGTATGACCAGTTGCTGTAG<br/>                     TTGTCTCAAGGGCTGTTGTTCTTGTGGTTCCTGTGCAAATTTGA<br/>                     TGAAGACGACTCTGAGCCAGTGCTCAAAGGAGTCAAATTACA<br/>                     TTACACATATCCGTATGATGTTCCGGATTATGCTTAG</p> | <p>METDLLLLVLLLLWV<br/>                     PGSTGDSGSSGSGSGD<br/>                     YKDHDGDYKDHDID<br/>                     YKDDDDKGGGSSG<br/>                     GNITNLCPFGEVFN<br/>                     TRFASVYAWNRRKRIS<br/>                     NCVADYSVLYNSASF<br/>                     STFCKYGVSPKLNLDL<br/>                     CFTNVYADSFVIRGDE<br/>                     VRQIAPGQTGKIADY<br/>                     NYKLPDDFTGCVIAW<br/>                     NSNNLDSKVGGNYN<br/>                     YLYRLFRRKSNLKPFR<br/>                     DISTEYQAGSTPCNG<br/>                     VEGFNCYFPLQSYGF<br/>                     QPTNGVGYPYRVVLS<br/>                     FELLHAPATVSSG<br/>                     GGGSGGGSSGGWP<br/>                     WYIWLGFIAGLIAIVM<br/>                     VTIMLCCMTSCCSCL<br/>                     KGCCSCGSCCKFDED<br/>                     DSEPVLKGVKLHYTY<br/>                     PYDVPDYA</p> |

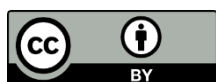

Supplement: membranes-10-00215-s001.pdf [file membranes-10-00215-s001.pdf]
